# Supplementary material
Source: publisher site journal article supplement (https://www.kjim.org/upload/media/kjim-2023-425-Supplementary-Table-4.pdf)
Supplement: Supplementary file 1 [file kjim-2023-425-Supplementary-Table-4.pdf]

**Supplementary Table 4. Additional analysis between pre- and post-menopausal women for the association between oral health score and hyperuricemia**

| Variable                                                | Hyperuricemia (uric acid > 7.0 mg/dL in male, > 6.0 mg/dL in female) |           |         |                           |           |         |
|---------------------------------------------------------|----------------------------------------------------------------------|-----------|---------|---------------------------|-----------|---------|
|                                                         | Crude OR                                                             | 95% CI    | p value | Adjusted OR <sup>a)</sup> | 95% CI    | p value |
| Pre-menopausal women subjects<br>(n = 4,930/5,581,335)  |                                                                      |           |         |                           |           |         |
| The number of dental caries                             |                                                                      |           |         |                           |           |         |
| 0                                                       | 1                                                                    |           |         | 1                         |           |         |
| 1–2                                                     | 1.36                                                                 | 1.02–1.82 | 0.005   | 1.07                      | 0.78–1.46 | 0.68    |
| ≥ 3                                                     | 1.87                                                                 | 1.26–2.77 | 0.04    | 1.19                      | 0.77–1.85 | 0.44    |
| The number of tooth brushing                            |                                                                      |           |         |                           |           |         |
| ≤ 1                                                     | 1                                                                    |           |         | 1                         |           |         |
| 2                                                       | 0.45                                                                 | 0.27–0.72 | < 0.001 | 0.52                      | 0.30–0.89 | 0.02    |
| ≥ 3                                                     | 0.47                                                                 | 0.30–0.75 | < 0.001 | 0.68                      | 0.41–1.16 | 0.16    |
| The use of secondary oral products                      |                                                                      |           |         |                           |           |         |
| No                                                      | 1                                                                    |           |         | 1                         |           |         |
| Yes                                                     | 0.87                                                                 | 0.68–1.12 | 0.27    | 1.02                      | 0.78–1.34 | 0.88    |
| Regular dental examination                              |                                                                      |           |         |                           |           |         |
| No                                                      | 1                                                                    |           |         | 1                         |           |         |
| Yes                                                     | 0.85                                                                 | 0.67–1.09 | 0.20    | 0.97                      | 0.75–1.27 | 0.85    |
| Post-menopausal women subjects<br>(n = 4,810/4,564,621) |                                                                      |           |         |                           |           |         |
| The number of dental caries                             |                                                                      |           |         |                           |           |         |
| 0                                                       | 1                                                                    |           |         | 1                         |           |         |
| 1–2                                                     | 1.33                                                                 | 1.04–1.70 | 0.02    | 1.22                      | 0.93–1.59 | 0.18    |
| ≥ 3                                                     | 1.08                                                                 | 0.69–1.69 | 0.73    | 1.03                      | 0.63–1.67 | 0.15    |
| The number of tooth brushing                            |                                                                      |           |         |                           |           |         |
| ≤ 1                                                     | 1                                                                    |           |         | 1                         |           |         |
| 2                                                       | 0.64                                                                 | 0.48–0.86 | 0.003   | 0.94                      | 0.68–1.31 | 0.32    |
| ≥ 3                                                     | 0.46                                                                 | 0.35–0.62 | < 0.001 | 0.89                      | 0.63–1.26 | 0.71    |
| The use of secondary oral products                      |                                                                      |           |         |                           |           |         |
| No                                                      | 1                                                                    |           |         | 1                         |           |         |
| Yes                                                     | 0.64                                                                 | 0.53–0.78 | < 0.001 | 0.86                      | 0.69–1.08 | 0.20    |
| Regular dental examination                              |                                                                      |           |         |                           |           |         |
| No                                                      | 1                                                                    |           |         | 1                         |           |         |
| Yes                                                     | 0.75                                                                 | 0.60–0.92 | 0.007   | 1.02                      | 0.81–1.30 | 0.85    |

OR, odds ratio; CI, confidence interval.

<sup>a)</sup>Logistic model was adjusted for age, sex, income level, body mass index, glomerular filtration rate, hypertension, diabetes, dyslipidemia, cancer, depression, smoking, alcohol consumption, and exercise status.
